# Supplementary material for: Bioactivity-Guided Identification of Anti-Adipogenic Isothiocyanates in the Moringa (Moringa oleifera) Seed and Investigation of the Structure-Activity Relationship
Source: PubMed Central journal article supplement (PMC7321240; doi:10.3390/molecules25112504), 2020-05-28
Supplement: molecules-25-02504-s001.pdf [file molecules-25-02504-s001.pdf]

Supplementary information

# Bioactivity-guided identification of anti-adipogenic isothiocyanates in the Moringa (*Moringa Oleifera*) seed and investigation of the structure-activity relationship

Linhua Huang <sup>1,2,†</sup>, Chunmao Yuan <sup>2,3,†</sup> and Yu Wang <sup>2,\*</sup>

<sup>1</sup> Citrus Research Institute, Southwest University, Xiema, Beibei, Chongqing 400712, P. R. China

<sup>2</sup> Citrus Research and Education Center, Food Science and Human Nutrition, University of Florida, 700 Experiment Station Road, Lake Alfred, Florida 33850, United States

<sup>3</sup> State Key Laboratory of Functions and Applications of Medicinal Plants, Guizhou Medical University, 3491 Baijin Road, Guiyang 550014, P. R. China

\* Correspondence: yu.wang@ufl.edu; Tel.: +1-863-956-8673

† These authors contributed equally to this work..

1D NMR data for compounds **1** and **2**.

Table S1 Effect of each fraction isolated from *Moringa Oleifera* seeds on lipid accumulation during 3T3-L1 adipocytes differentiation.

Table S2 Inhibition of compound **2** on intracellular lipid accumulation during 3T3-L1 cells differentiation.

Table S3 Effect of each ITCs on lipid accumulation during 3T3-L1 adipocytes differentiation.

Figure S1. The <sup>1</sup>H NMR spectrum (400 MHz, CD<sub>3</sub>OD) of **1**.

Figure S2. The <sup>13</sup>C NMR (100 MHz, CD<sub>3</sub>OD) of **1**.

Figure S3. The <sup>1</sup>H NMR spectrum (400 MHz, CD<sub>3</sub>OD) of **2**.

Figure S4. The <sup>13</sup>C NMR (100 MHz, CD<sub>3</sub>OD) of **2**.

Figure S5. Total ion chromatogram (TIC) of the isolates (**1** and **2**) in *Moringa Oleifera* seeds extract.

Figure S6. The HR-ESI-MS spectrum of **1**.

Figure S7. The HR-ESI-MS spectrum of **2**.

1D NMR data for compounds **1** and **2**.

Niazinin B (**1**) Light yellow oil; HR-ESI-MS (negative ion mode):  $m/z$  calcd. for  $C_{16}H_{22}NO_8S [M + HCOO]^-$ , 388.1066; found, 388.1080.  $^1H$  NMR (400 MHz,  $CD_3OD$ ):  $\delta$  7.04/7.03 (H-2, H-6, d,  $J = 8.4$  Hz), 7.28/7.22 (H-3, H-5, d,  $J = 8.4$  Hz), 4.65 (H-7, s), 5.42 (H-1', d,  $J = 1.8$  Hz), 4.00 (H-2', dd,  $J = 3.5, 1.9$  Hz), 3.86 (H-3', dd,  $J = 9.5, 3.5$  Hz), 3.47 (H-4', t,  $J = 9.0$  Hz), 3.64 (H-5', m), 1.23 (H-6', d,  $J = 6.4$  Hz), 3.97 (OMe, s);  $^{13}C$ -NMR (150 MHz,  $CD_3OD$ ):  $\delta$  155.8 (C-1), 116.5 (C-2, C-6), 128.8/128.4 (C-3, C-5), 131.7 (C-4), 47.8/45.4 (C-7), 191.8 (C-8), 98.5 (C-1'), 69.2 (C-2'), 70.7 (C-3'), 70.9 (C-4'), 72.5 (C-5'), 16.7 (C-6'), 56 (OMe).

4-( $\alpha$ -L-Rhamnosyloxy) benzyl isothiocyanate (**2**) Light yellow oil; HR-ESI-MS (negative ion mode):  $m/z$  calcd. for  $C_{15}H_{18}NO_7S [M + HCOO]^-$ , 356.0804; found, 356.0818.  $^1H$  NMR (400 MHz,  $CD_3OD$ ):  $\delta$  7.12 (H-2, H-6, d,  $J = 8.4$  Hz), 7.33 (H-3, H-5, d,  $J = 8.4$  Hz), 4.72 (H-7, s), 5.46 (H-1', br s), 4.02 (H-2', dd,  $J = 3.3, 1.6$  Hz), 3.86 (H-3', dd,  $J = 9.4, 3.3$  Hz), 3.48 (H-4', t,  $J = 9.6$  Hz), 3.64 (H-5', m), 1.24 (H-6', d,  $J = 6.2$  Hz);  $^{13}C$ -NMR (150 MHz,  $CD_3OD$ ):  $\delta$  156.4 (C-1), 116.5 (C-2, C-6), 128.3 (C-3, C-5), 128.2 (C-4), 48.0 (C-7), 131.9 (C-8), 98.5 (C-1'), 70.6 (C-2'), 70.8 (C-3'), 72.4 (C-4'), 69.3 (C-5'), 16.6 (C-6').

**Table S1** Effect of each fraction isolated from *Moringa Oleifera* seeds on lipid accumulation during 3T3-L1 adipocytes differentiation.

| Sample                              | Dose ( $\mu\text{g/ml}$ ) | Lipid accumulation (% of control) <sup>a</sup> | Cell survival rate (% of control) |
|-------------------------------------|---------------------------|------------------------------------------------|-----------------------------------|
| <b>Ethyl acetate</b>                | 100                       | 95.3 $\pm$ 4.3                                 | 90.5 $\pm$ 4.6                    |
| <b>Water layer</b>                  | 100                       | 53.6 $\pm$ 2.4**                               | 96.4 $\pm$ 5.7                    |
| <b>Fr. 1</b>                        | 100                       | 95.3 $\pm$ 4.8                                 | 96.7 $\pm$ 2.8                    |
| <b>Fr. 2</b>                        | 100                       | 99.3 $\pm$ 5.1                                 | 100 $\pm$ 2.2                     |
| <b>Fr. 3</b>                        | 100                       | 91.9 $\pm$ 3.8                                 | 99.8 $\pm$ 1.9                    |
| <b>Fr. 4</b>                        | 100                       | 102.1 $\pm$ 7.4                                | 100 $\pm$ 4.2                     |
| <b>Fr. 5</b>                        | 100                       |                                                | 35.7 $\pm$ 2.8                    |
| <b>Fr. 5</b>                        | 15                        | 57.5 $\pm$ 3.1**                               | 93.2 $\pm$ 2.9                    |
| <b>Fr. 5</b>                        | 10                        | 71.9 $\pm$ 3.6*                                | 91.5 $\pm$ 3.8                    |
| <b>Fr. 5a</b>                       | 100                       | 92.5 $\pm$ 4.1                                 | 95.7 $\pm$ 4.6                    |
| <b>Fr. 5a</b>                       | 15                        | 94.8 $\pm$ 5.4                                 | 96.4 $\pm$ 3.2                    |
| <b>Fr. 5a</b>                       | 10                        | 99.5 $\pm$ 7.3                                 | 100 $\pm$ 4.4                     |
| <b>Fr. 5b</b>                       | 100                       | 93.6 $\pm$ 4.9                                 | 97.5 $\pm$ 5.1                    |
| <b>Fr. 5b</b>                       | 15                        | 98.2 $\pm$ 5.2                                 | 101 $\pm$ 2.6                     |
| <b>Fr. 5b</b>                       | 10                        | 99.3 $\pm$ 7.0                                 | 103 $\pm$ 2.9                     |
| <b>Fr. 5c</b>                       | 100                       |                                                | 20.7 $\pm$ 3.7                    |
| <b>Fr. 5c</b>                       | 15                        |                                                | 48.6 $\pm$ 3.1                    |
| <b>Fr. 5c</b>                       | 10                        | 37.6 $\pm$ 3.7**                               | 90.5 $\pm$ 1.9                    |
| <b>Control</b>                      | 100                       | 100.0 $\pm$ 3.2                                | 100 $\pm$ 1.6                     |
| <b>Positive Control (Quercetin)</b> | 50                        | 34.5 $\pm$ 3.6**                               | 92.4 $\pm$ 3.7                    |

Each value is expressed as a mean  $\pm$  standard deviation (n = 3). \*\*p < 0.01 vs. control,

\*p < 0.05 vs. control.

**Table S2** Inhibition of compound 2 on intracellular lipid accumulation during 3T3-L1 cells differentiation.

| Sample                              | Dose ( $\mu\text{g/ml}$ ) | Lipid accumulation (% of control)* | Cell survival rate (% of control) |
|-------------------------------------|---------------------------|------------------------------------|-----------------------------------|
| <b>2</b>                            | 10                        | 36.8 $\pm$ 3.3**                   | 92.5 $\pm$ 4.6                    |
| <b>2</b>                            | 8                         | 75.5 $\pm$ 4.2*                    | 91.4 $\pm$ 3.7                    |
| <b>2</b>                            | 6                         | 88.0 $\pm$ 6.5                     | 92.7 $\pm$ 3.2                    |
| <b>2</b>                            | 4                         | 95.2 $\pm$ 5.8                     | 99.7 $\pm$ 4.5                    |
| <b>Control</b>                      | 100                       | 100.0 $\pm$ 6.7                    | 100.6 $\pm$ 3.2                   |
| <b>Positive Control (Quercetin)</b> | 50                        | 35.2 $\pm$ 3.2**                   | 94.7 $\pm$ 2.8                    |

\*Each value is expressed as a mean  $\pm$  standard deviation (n = 3). \*\*p < 0.01 vs. control,

\*p < 0.05 vs. control.

**Table S3** Effect of each ITCs on lipid accumulation during 3T3-L1 adipocytes differentiation.

| Sample                              | Dose ( $\mu$ M) | Lipid accumulation (% of control) * | Cell survival rate (% of control) |
|-------------------------------------|-----------------|-------------------------------------|-----------------------------------|
| 2                                   | 60              |                                     | 35.6 $\pm$ 5.7                    |
| 2                                   | 30              | 30.6 $\pm$ 3.1**                    | 92.4 $\pm$ 5.3                    |
| 2                                   | 20              | 76.2 $\pm$ 4.9*                     | 94.7 $\pm$ 3.8                    |
| 2                                   | 10              | 94.8 $\pm$ 8.4                      | 95.5 $\pm$ 2.8                    |
| 3                                   | 60              | 89.9 $\pm$ 6.3                      | 94.8 $\pm$ 3.5                    |
| 3                                   | 30              | 107.0 $\pm$ 5.8                     | 96.8 $\pm$ 4.7                    |
| 4                                   | 60              | 82.4 $\pm$ 2.8                      | 98.9 $\pm$ 3.8                    |
| 4                                   | 30              | 103 $\pm$ 5.7                       | 100 $\pm$ 3.9                     |
| 5                                   | 60              | 62.5 $\pm$ 4.2*                     | 97.5 $\pm$ 3.8                    |
| 5                                   | 30              | 86.3 $\pm$ 5.5                      | 98.5 $\pm$ 5.3                    |
| 6                                   | 60              | 79.8 $\pm$ 4.3                      | 97.4 $\pm$ 3.7                    |
| 6                                   | 30              | 109.2 $\pm$ 7.1                     | 100.4 $\pm$ 5.4                   |
| 7                                   | 60              | 97.1 $\pm$ 5.7                      | 97.8 $\pm$ 3.6                    |
| 7                                   | 30              | 125.3 $\pm$ 6.2                     | 101 $\pm$ 4.8                     |
| 8                                   | 60              | 105.5 $\pm$ 8.3                     | 100 $\pm$ 4.5                     |
| 8                                   | 30              | 104.2 $\pm$ 9.1                     | 96.6 $\pm$ 4.4                    |
| 9                                   | 60              |                                     | 35.8 $\pm$ 3.1                    |
| 9                                   | 30              |                                     | 47.9 $\pm$ 1.9                    |
| 9                                   | 20              | 51.9 $\pm$ 3.8**                    | 90.5 $\pm$ 2.7                    |
| 9                                   | 10              | 83.3 $\pm$ 6.6                      | 97.4 $\pm$ 2.4                    |
| 10                                  | 60              |                                     | 38.6 $\pm$ 4.0                    |
| 10                                  | 30              |                                     | 46.6 $\pm$ 4.5                    |
| 10                                  | 20              | 37.1 $\pm$ 2.5**                    | 92.8 $\pm$ 3.4                    |
| 10                                  | 10              | 84.2 $\pm$ 5.2                      | 95.5 $\pm$ 2.3                    |
| 11                                  | 60              | 92.4 $\pm$ 6.7                      | 96.7 $\pm$ 4.5                    |
| 11                                  | 30              | 104.2 $\pm$ 8.3                     | 100.9 $\pm$ 3.6                   |
| <b>Control</b>                      | 100             | 100.0 $\pm$ 5.1                     | 100 $\pm$ 3.2                     |
| <b>Positive Control (Quercetin)</b> | 60              | 66.3 $\pm$ 3.9*                     | 95.5 $\pm$ 2.4                    |
| <b>Positive Control (Quercetin)</b> | 30              | 88.2 $\pm$ 6.1                      | 96.4 $\pm$ 3.7                    |

\*Each value is expressed as a mean  $\pm$  standard deviation (n = 3). \*\*p < 0.01 vs. control, \*p < 0.05 vs. control.



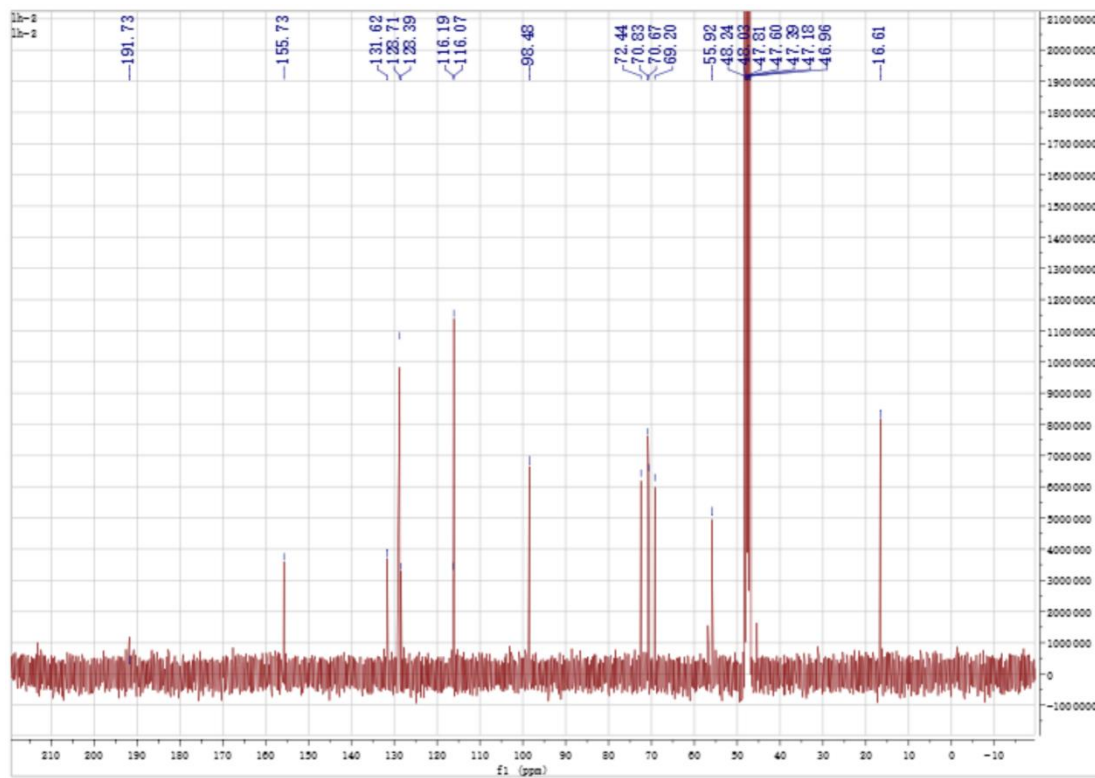

Fig. S2. The  $^{13}\text{C}$  NMR (100 MHz,  $\text{CD}_3\text{OD}$ ) of **1**





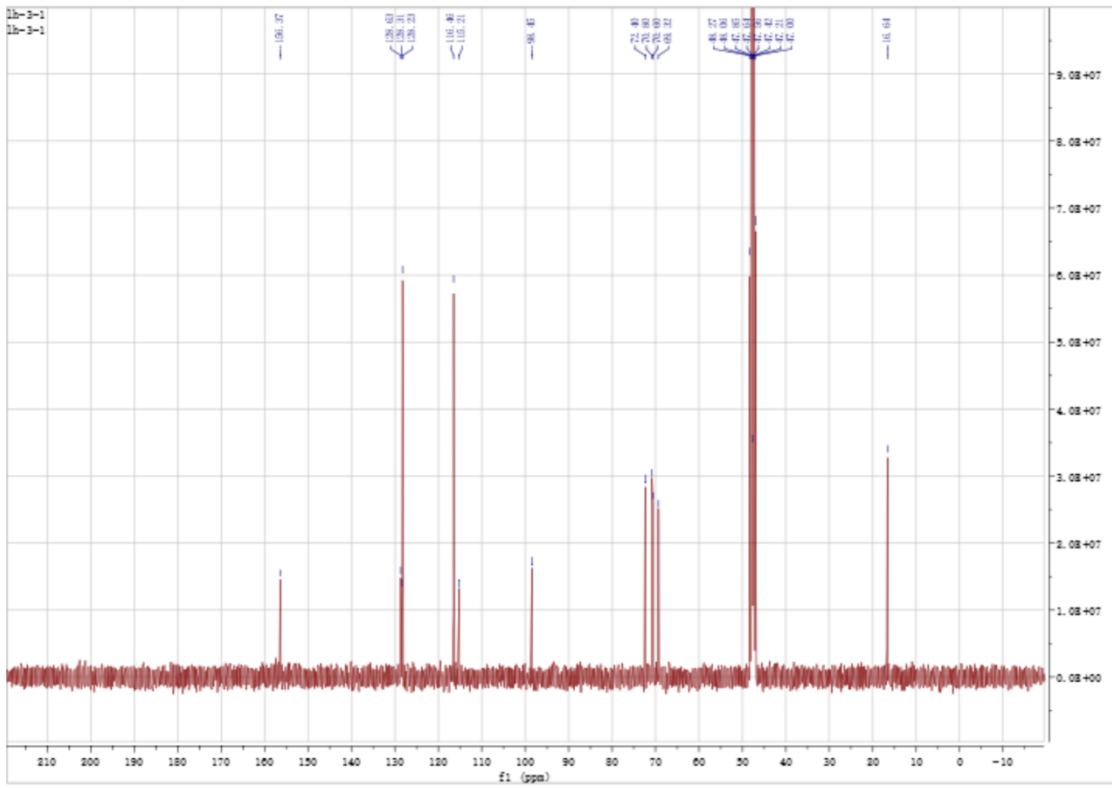

**Fig. S4.** The  $^{13}\text{C}$  NMR (100 MHz,  $\text{CD}_3\text{OD}$ ) of **2**.

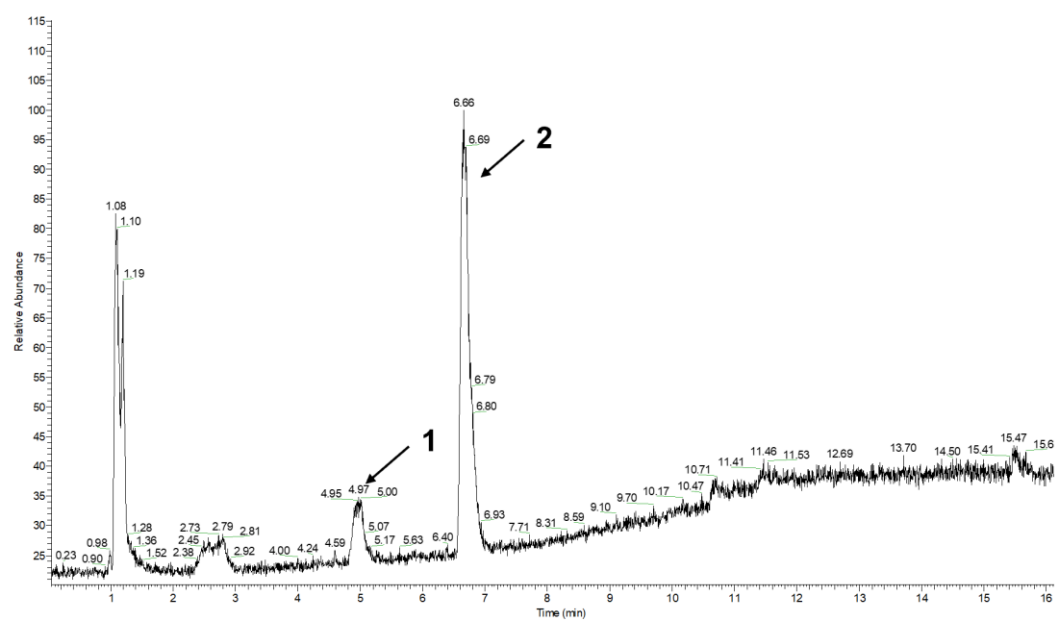

**Fig. S5.** Total ion chromatogram (TIC, negative ion mode) of the isolates (1 and 2) in *Moringa Oleifera* seeds extract.

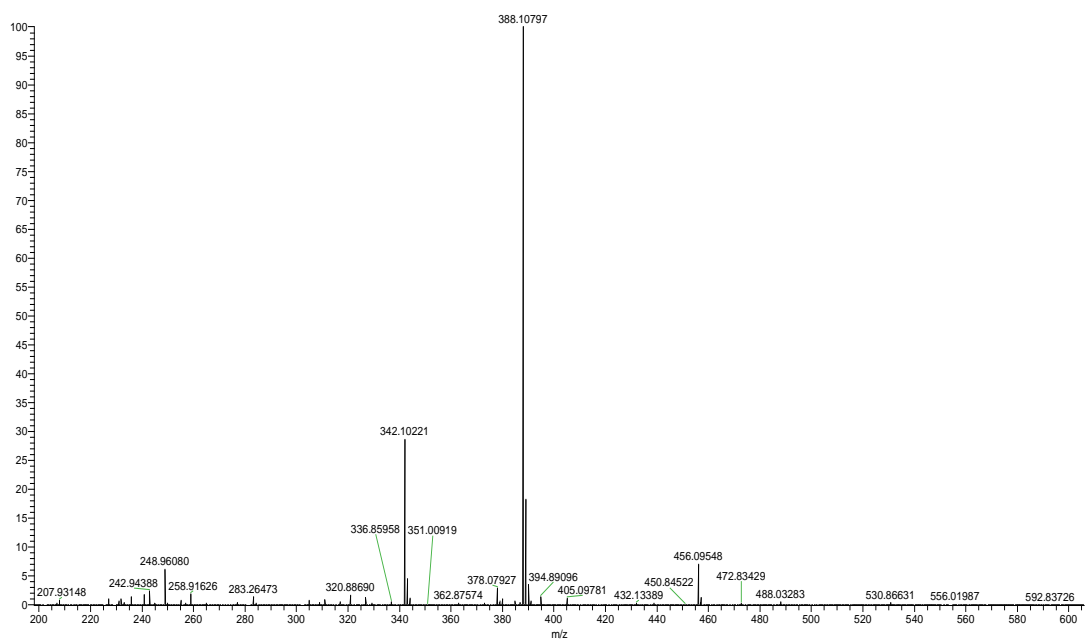

**Fig. S6.** The HR-ESI-MS (negative ion mode) spectrum of **1**.

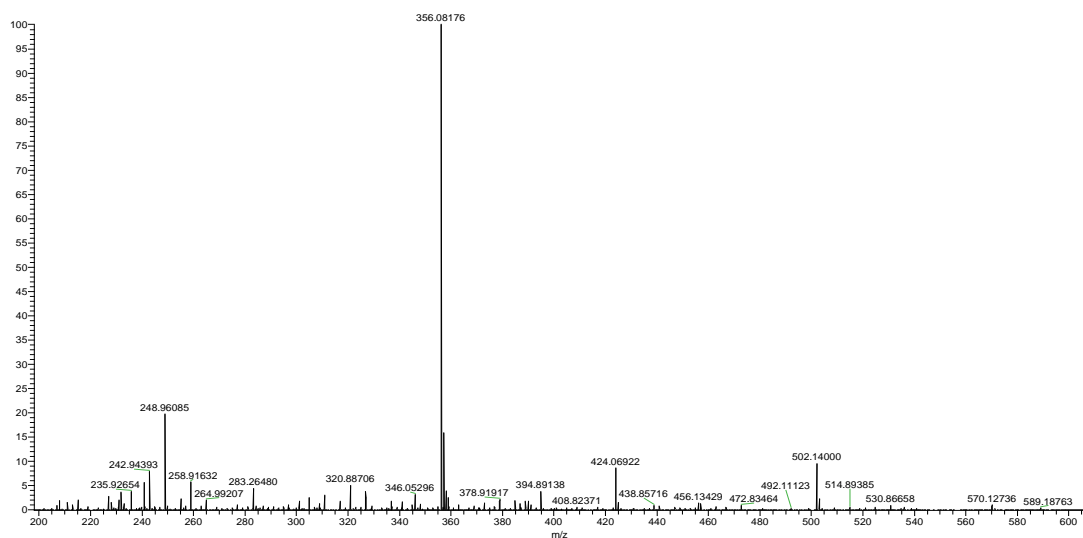

**Fig. S7.** The HR-ESI-MS (negative ion mode) spectrum of **2**.
